# Supplementary material
Source: PubMed Central journal article supplement (PMC7076208)
Supplement: supp_RA119.012196_157552_1_supp_450919_q36w6g.pdf [file supp_RA119.012196_157552_1_supp_450919_q36w6g.pdf]

# Supplemental Figure 1

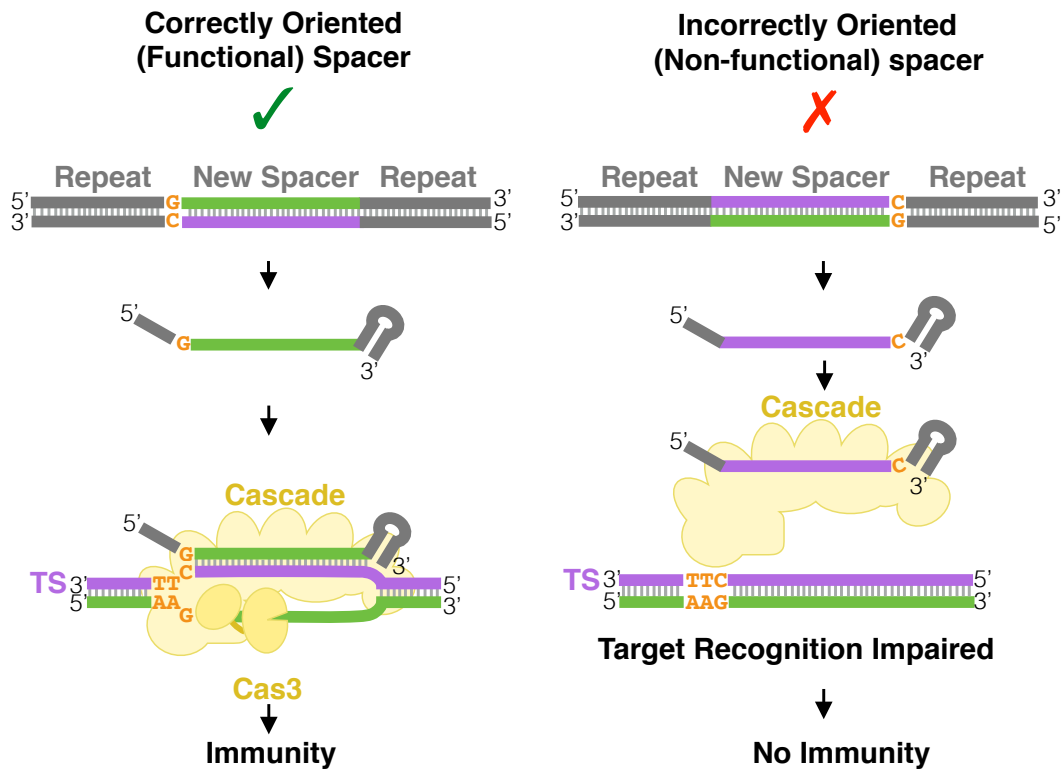

## Impact of Spacer Orientation on Target Recognition and Immunity

Schematic depicting the consequence of incorrectly oriented spacers on target recognition and immunity. Only the portion of a CRISPR array with a newly incorporated spacer is shown. The strand deriving from the CTT sequence of a prespacer is colored purple and its complementary strand is colored green. Upon integration in the correct orientation (left), the new spacer is transcribed into a crRNA that is functional for recognition of the target strand (TS) by Cascade, the surveillance complex in type I systems, and subsequent degradation by the helicase-nuclease Cas3. If the new spacer is incorrectly oriented (right), the resulting crRNA will not be complementary to the target strand, thus impairing target recognition and subsequent immunity.

# Supplemental Figure 2

## Region of the M13 Phage genome containing the PAM and Prespacer

**M13**

PAM
Prespacer

5' AGTTGAAATTAACCATCTCAAGCCCAATTTACTACTCGTTCTGGTGTTCTCTCGTCAGGGCAAGCCTTATTCACT 3'

3' TCAACTTTAATTTGGTAGAGTTCGGGTTAAATGATGAGCAAGACCACAAAGAGCAGTCCCGTTCGGAATAAGTGA 5'

**Pre-processed prespacer (PP)**

5nt
23nt
5nt

5' ATTTACTACTCGTTCTGGTGTTCTCTCGT 3'

3' CGGGTTAAATGATGAGCAAGACCACAAA 5'

**Unprocessed prespacer (UP)**

15nt
23nt
15nt

3' TGGTAGAGTTCGGGTTAAATGATGAGCAAGACCACAAA GAA 3'

10 98 7 6 5
5 6 7 8 9 10

### M13 Phage Derived Prespacers

Region of the M13 phage genome from which the most abundant spacer acquired following M13 bacteriophage infection is derived. DNA strand that is flanking the CTT sequence, denoted as PAM strand in text, is colored purple and complementary strand, denoted as non-PAM strand, is colored green. PAMs in the genome sequence are colored orange. The AAG (orange) in the 3' overhang of the non-PAM strand of the unprocessed prespacer is mutated to GAA (pink) to eliminate any potential contact by Cas1-Cas2. Numbers on the overhang indicate overhang length.

# Supplemental Figure 3

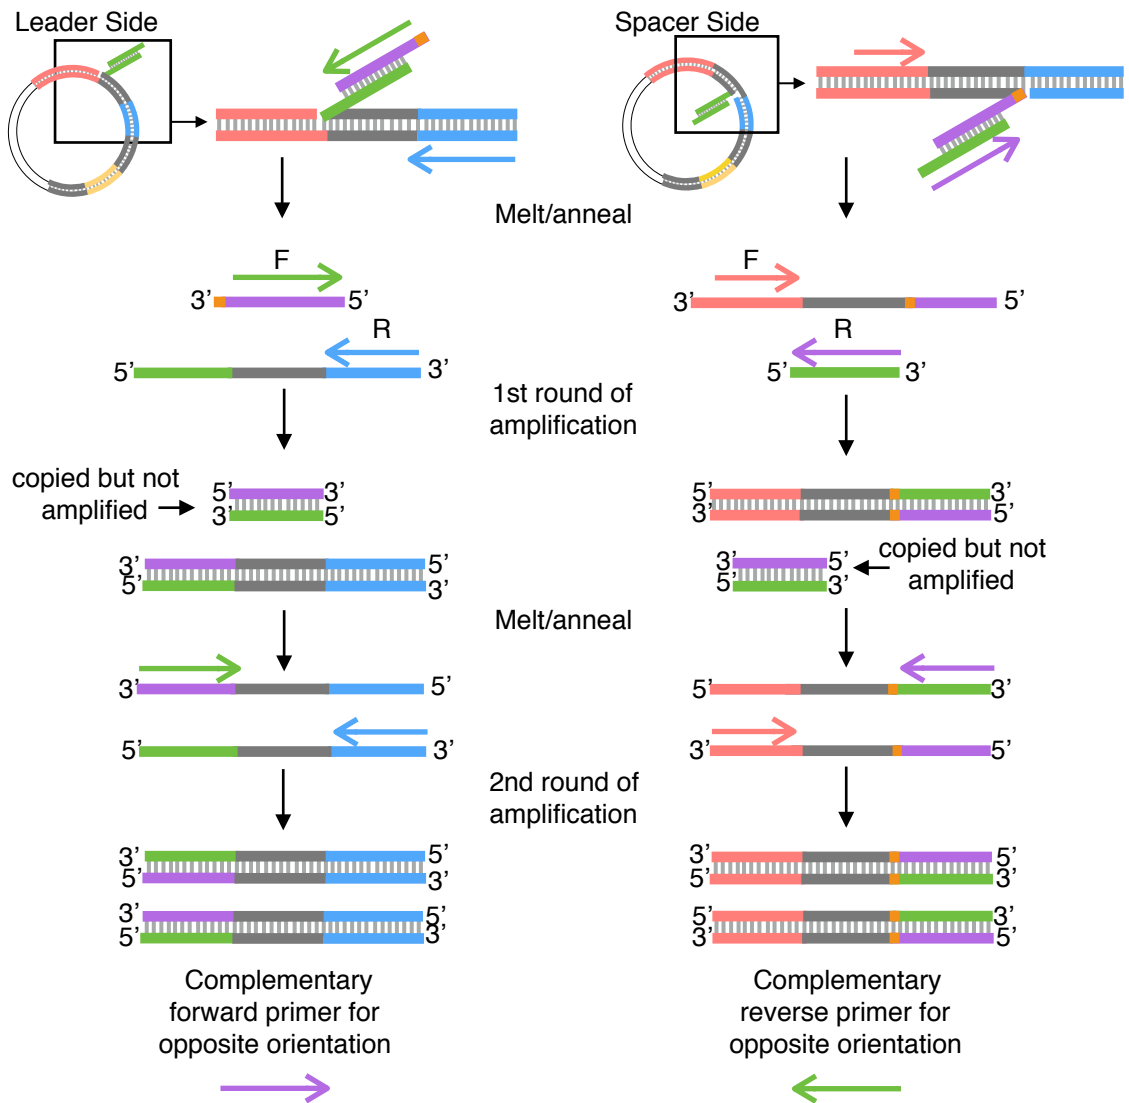

## PCR amplification of half-site integration products

Left: PCR amplification steps using primers that amplify leader-side integration events in the correct orientation. For the incorrect orientation, a complementary forward primer was used. Right: Steps for amplification of spacer-side integration events in the correct orientation. A complementary reverse primer was used for the incorrect orientation. The actual spacer side primer used for PCR and qPCR binds to spacer 4 and spacer 2 respectively, not spacer 1, as shown here for simplicity.

# Supplemental Figure 4

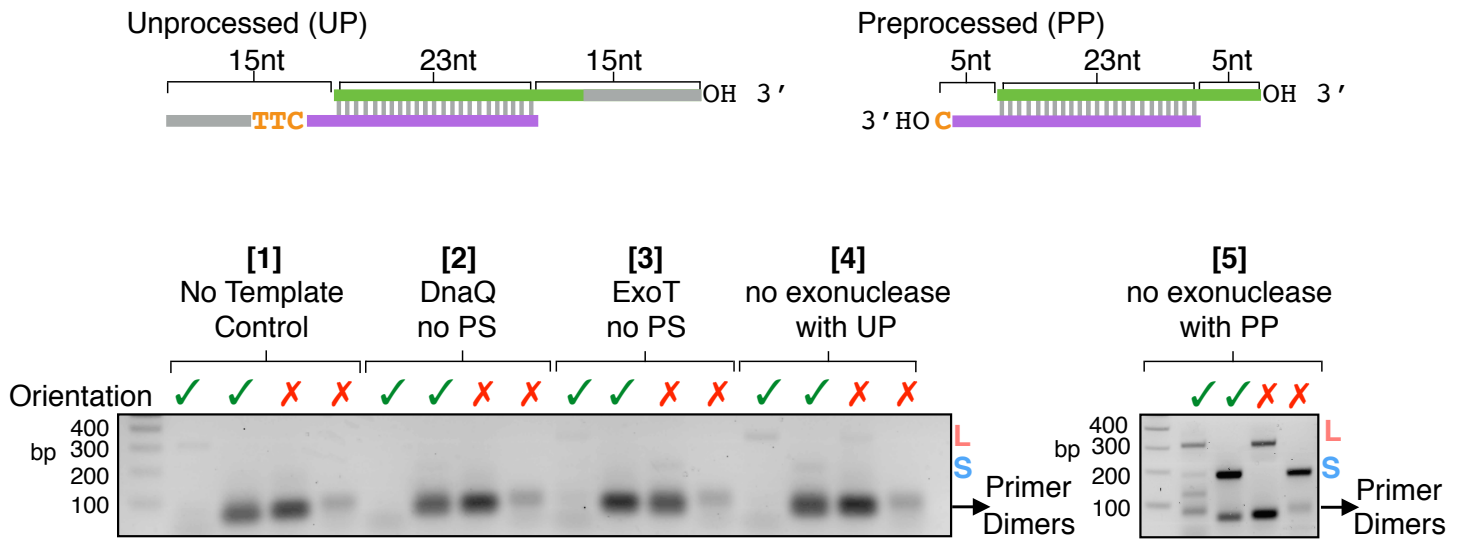

## PCR amplification of background controls

To ensure that amplification is specific to integration events, open circle species of control reactions were gel extracted and PCR amplified with the same primers used in Figure 2C. [1] PCR reactions with water. [2] control reactions containing Cas1-Cas2, IHF and DnaQ in the absence of prespacer (PS). [3] control reactions containing Cas1-Cas2, IHF and ExoT in the absence of PS. [4] control reactions containing Cas1-Cas2, IHF and UP in the absence of exonuclease. [5] control reactions containing Cas1-Cas2, IHF and PP in the absence of exonuclease.

# Supplemental Figure 5

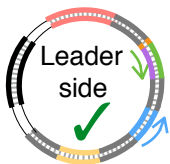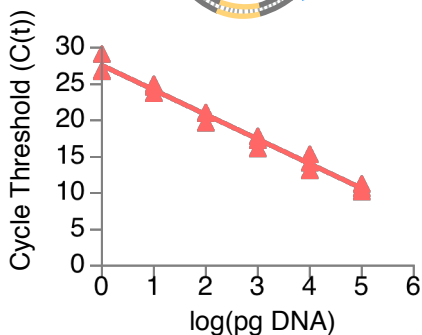

|                   |        |
|-------------------|--------|
| Primer Efficiency | 97%    |
| Slope             | -3.397 |
| R <sup>2</sup>    | 0.9819 |
| N                 | 3      |

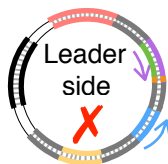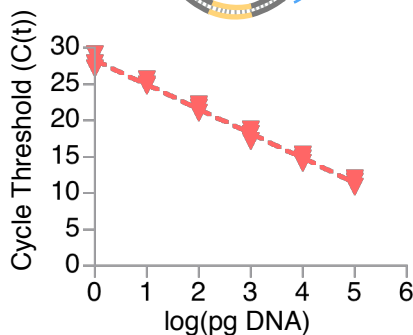

|                   |        |
|-------------------|--------|
| Primer Efficiency | 98%    |
| Slope             | -3.370 |
| R <sup>2</sup>    | 0.9899 |
| N                 | 3      |

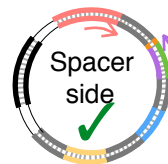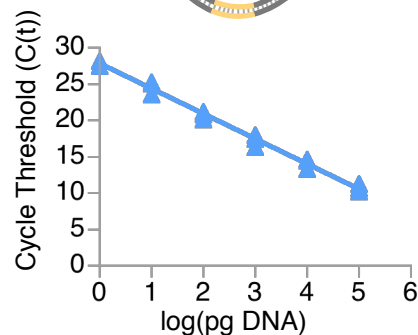

|                   |        |
|-------------------|--------|
| Primer Efficiency | 95%    |
| Slope             | -3.461 |
| R <sup>2</sup>    | 0.99   |
| N                 | 3      |

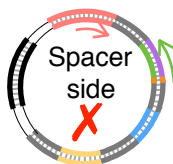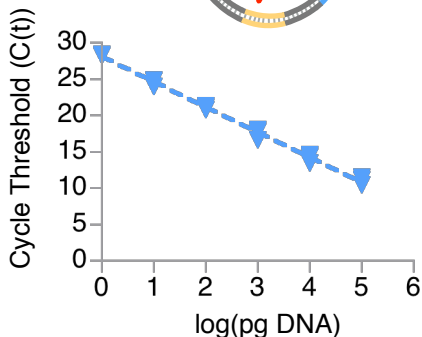

|                   |        |
|-------------------|--------|
| Primer Efficiency | 95%    |
| Slope             | -3.460 |
| R <sup>2</sup>    | 0.9940 |
| N                 | 3      |

Overlay of all four  
Primer sets

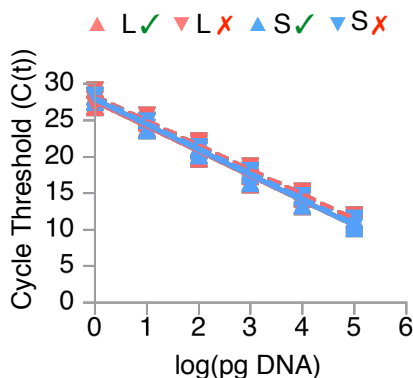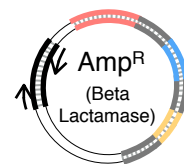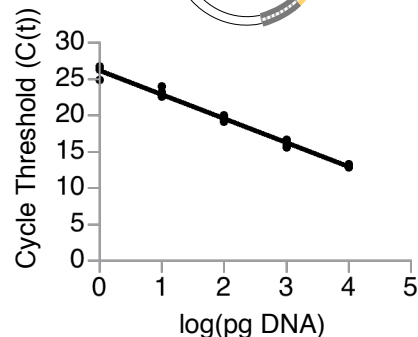

|                   |        |
|-------------------|--------|
| Primer Efficiency | 100%   |
| Slope             | -3.316 |
| R <sup>2</sup>    | 0.9863 |
| N                 | 3      |

## Standard Curves for qPCR

Standard curves used to check primer efficiency of all primer sets used for qPCR, relating pg amounts of DNA to Ct values. Relative amounts of each half-site integration product were normalized to template amounts of the beta lactamase gene. Plasmids above each graph depict templates and primer sets used for each PCR reaction. Average values of 3 replicates are shown in the tables below the graph.

# Supplemental Figure 6

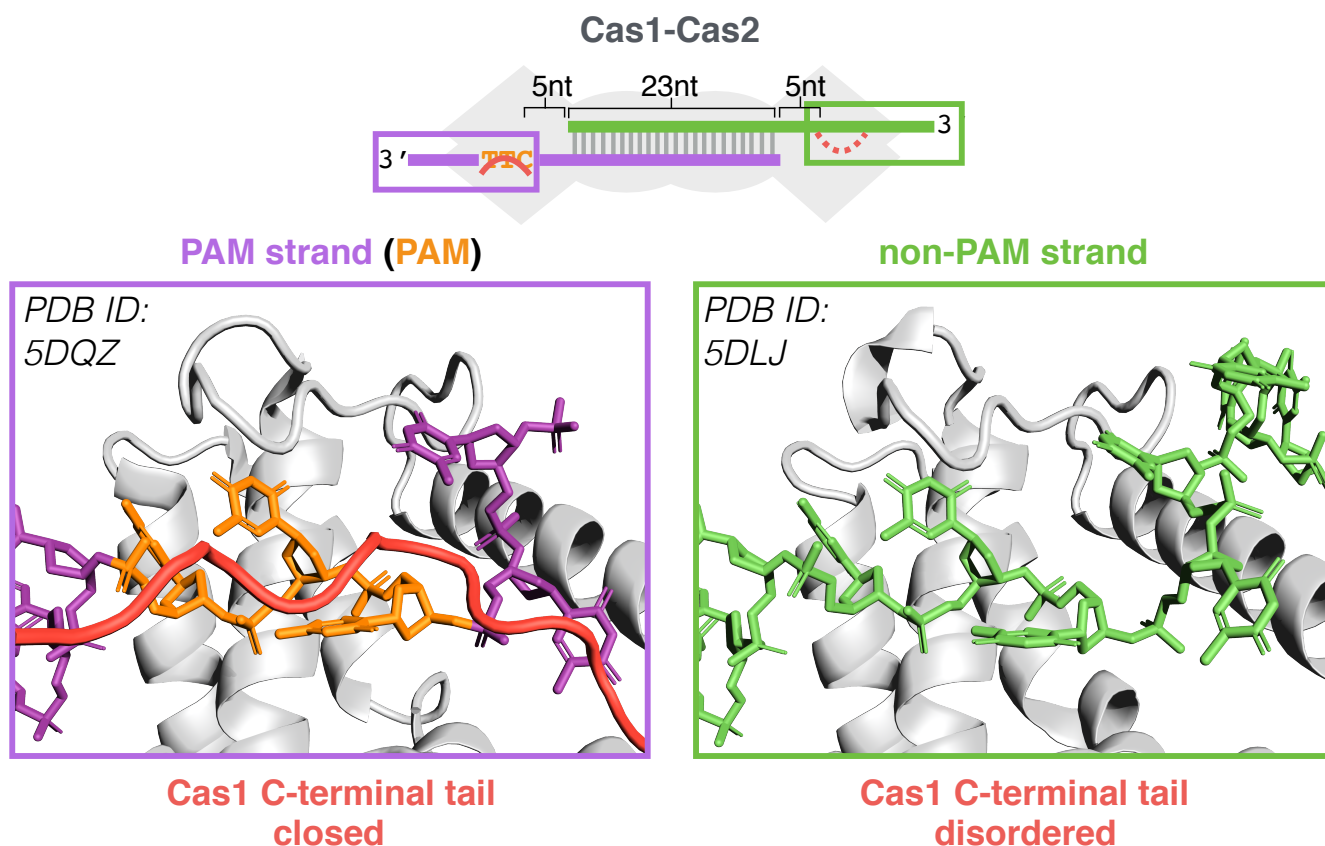

## **PAM Recognition by Cas1 C-terminal Tail**

Zoomed-in view of the C-terminal tail of Cas1 in complex with DNA either containing PAM (left; colored purple) or lacking PAM (right; colored green). When bound to DNA containing the PAM sequence, the C-terminal tail is well ordered and involved in specific contacts with the PAM sequence, CTT, but when bound to DNA lacking a PAM sequence, the C-terminal tail is disordered. A schematic of the Cas1-Cas2 complex bound to the unprocessed prespacer is shown above for reference. Dark orange solid and dashed lines on the 3' overhangs correspond to ordered and disordered c-terminal tails respectively.

# Supplemental Figure 7

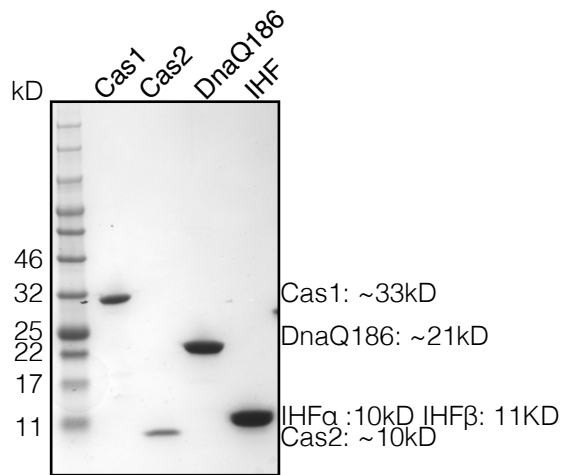

## Purified Proteins used in Integration Assays

SDS-PAGE of Cas1, Cas2, DnaQ186, and IHF. L indicates Ladder. Approximate size of each protein is indicated on the right of the gel.

**Table 1.** Prespacer oligonucleotides used in this study

| Overhang Length (nt) (Description) | Non-PAM Strand (5'→3')                     | PAM Strand (5'→3')                         | Figures       |
|------------------------------------|--------------------------------------------|--------------------------------------------|---------------|
| 5 (Preprocessed)                   | ATTTACTACTCGTTCTGGTGTTCCTCGT               | AAACACCAGAACGAGTAGTAAATTGGGC               | 1, 2, 3, 4, 5 |
| 15 (Unprocessed)                   | ATTTACTACTCGTTCTGGTGTTCCTCGT<br>CAGGGCGAAC | AAACACCAGAACGAGTAGTAAATTGGGC<br>TTGAGATGGT | 1,2, 3, 4, 5  |
| 15 (No PAM)                        | ATTTACTACTCGTTCTGGTGTTCCTCGT<br>CAGGGCGAAC | AAACACCAGAACGAGTAGTAAATTGGGG<br>AAGAGATGGT | 2             |
| 4                                  | ATTTACTACTCGTTCTGGTGTTCCTCG                | AAACACCAGAACGAGTAGTAAATTGGG                | 3, 4          |
| 6                                  | ATTTACTACTCGTTCTGGTGTTCCTCGT<br>C          | AAACACCAGAACGAGTAGTAAATTGGGC<br>T          | 3, 4          |
| 7                                  | ATTTACTACTCGTTCTGGTGTTCCTCGT<br>CA         | AAACACCAGAACGAGTAGTAAATTGGGC<br>TT         | 3, 4, 5       |
| 8                                  | ATTTACTACTCGTTCTGGTGTTCCTCGT<br>CAG        | AAACACCAGAACGAGTAGTAAATTGGGC<br>TTG        | 3, 4          |
| 9                                  | ATTTACTACTCGTTCTGGTGTTCCTCGT<br>CAGG       | AAACACCAGAACGAGTAGTAAATTGGGC<br>TTGA       | 3, 4, 5       |
| 10                                 | ATTTACTACTCGTTCTGGTGTTCCTCGT<br>CAGGG      | AAACACCAGAACGAGTAGTAAATTGGGC<br>TTGAG      | 3, 4,         |

**Table 2.** Oligonucleotides used in Radiation Integration Assay (Figures 2 and 5)

| Description                         | 5'→3' Sequence                                                                                                      |
|-------------------------------------|---------------------------------------------------------------------------------------------------------------------|
| Leader-Repeat-Spacer Oligo Target F | GTTGGTAGATTGTGACTGGCTTAAAAATCATTAATTAATAATAGGTTATGTTTAGAGTGT<br>TCCCGCGCCAGCGGGGATAAACCGAGCA                        |
| Leader-Repeat-Spacer Oligo Target R | TGCTCGGTTTATCCCGCTGGCGCGGGGAACACTCTAAACATAACCTATTATTAATTAATG<br>ATTTTTAAGCCAGTCACAATCTACCAAC                        |
| Leader-Side Expected Product Marker | ATTTACTACTCGTTCTGGTGTTCCTCGTGTGTTCCTCGCGCCAGCGGGGATAAACCGAGCA                                                       |
| Spacer Side Expected Product Marker | AAACACCAGAACGAGTAGTAAATTGGGCGGTTTATCCCGCTGGCGCGGGGAACACTCTAA<br>ACATAACCTATTATTAATTAATGATTTTTAAGCCAGTCACAATCTACCAAC |

**Table 3.** Primers used for End-point PCR (Figures 2 and S3)

| Description                                    | Forward Primer (5'→3')                       | Reverse Primer (5'→3')                          |
|------------------------------------------------|----------------------------------------------|-------------------------------------------------|
| Leader-side correctly oriented M13 prespacer   | TTAAGAAGGAGATATAGATCCCAATT<br>TACTACTCGTTC   | TTATGGAGTTGGGATCTTATTACAGTGTCA<br>ACAATCGTTCCC* |
| Leader-side incorrectly Oriented M13 Prespacer | TTAAGAAGGAGATATAGATCACGAGAA<br>ACACCAGAACGAG | TTATGGAGTTGGGATCTTATTACAGTGTCA<br>ACAATCGTTCCC* |
| Spacer-Side Correctly Oriented M13 Prespacer   | TTAAGAAGGAGATATAGATCTGGATGT<br>GTTGTTTGTGTGA | TTATGGAGTTGGGATCTTATTAACGAGAAA<br>CACCAGAACGAG  |
| Spacer-Side Incorrectly Oriented M13 Prespacer | TTAAGAAGGAGATATAGATCTGGATGT<br>GTTGTTTGTGTGA | TTATGGAGTTGGGATCTTATTACCCAATTT<br>ACTACTCGTTC   |

All primers contain LIC2 handle sequences for potential cloning purposes

\* Primer complementary to spacer 4

**Table 4.** Primers used for qPCR (Figures 2, S3, and S5)

| Description                                    | Forward Primer (5'→3') | Reverse Primer (5'→3')     |
|------------------------------------------------|------------------------|----------------------------|
| Leader-side correctly oriented M13 prespacer   | TACTCGTTCTGGTGTTCCTCGT | CGTTTTTGGAAATTTACAGCGAGG * |
| Leader-side incorrectly Oriented M13 Prespacer | CGAGAAACACCAGAACGAGTAG | GTTTTTGGAAATTTACAGCGAGGC * |
| Spacer-Side Correctly Oriented M13 Prespacer   | AGTTGGTAGATTGTGACTGGCT | ACGAGAAACACCAGAACGAGT      |
| Spacer-Side Incorrectly Oriented M13 Prespacer | AGTTGGTAGATTGTGACTGGCT | GCCCAATTTACTACTCGTTCCTGG   |

\* Primer complementary to spacer 2



**Table 5.** Oligonucleotides used for cloning

| Insert                    | Strain          | Vector                                          | Forward Primer (5'->3')                               | Reverse Primer (5'->3')                          |
|---------------------------|-----------------|-------------------------------------------------|-------------------------------------------------------|--------------------------------------------------|
| Cas1                      | K12<br>(MG1655) | pHAT4                                           | GTGTGTCCATGGGTATGACC<br>TGGCTTCCCCTTAATC              | GTGTGTGAATTCTCAGCTACTC<br>CGATGGCCTGCATC         |
| Cas2                      | K12<br>(MG1655) | pMAT11                                          | GTGTGTCCATGGGAAGTATG<br>TTGGTCGTGGTC                  | GTGTGTGAATTCTCAAACAGGT<br>AAAAAAGACACC           |
| IHF $\alpha$ -IHF $\beta$ | K12<br>(MG1655) | pET His6 TEV LIC<br>cloning vector (1B)         | TACTTCCAATCCAATGCAAT<br>GACCAAGTCAGAATTGA             | TTATCCACTTCCAATGTTATTA<br>TTACTCGTCTTTGGGCGAA    |
| DnaQ186                   | K12<br>(MG1655) | pET His6 Sumo<br>TEV LIC cloning<br>vector (1S) | CAACAGCAGACGGGAGGTAT<br>GAGCACTGCAATTACACG            | GCGAGAACCAAGGAAAGGTTAT<br>TAAGCCATCGACGTTTGACCAC |
| CRISPR<br>array           | BL21(AI)        | pET LIC cloning<br>vector (2A-T)                | TTTAAGAAGGAGATATAGAT<br>CGATTAAGTACTCTTTAACA<br>TAATG | TTATGGAGTTGGGATCTTATTA<br>ACGTGGATATGTTGCTTATTAC |
